# Supplementary material for: Record of Caromiobenella (Copepoda, Monstrilloida) in Brazil and Discovery of the Male of C. brasiliensis: Morphological and Molecular Evidence
Source: MDPI journal article supplement (doi:10.3390/d13060241), 2021-05-31
Supplement: s1 [file s1]

## Supplementary Material

**Table S1.** GenBank sequences used for comparisons with Brazilian copepods sequences (present study) and for the construction of Maximum Likelihood Tree. Sequences of Brazilian copepods were posteriorly included in Genbank and appear in bold.

**Citation:** Cruz Lopes da Rosa, J.; Oliveira Dias, C.; Suárez-Morales, E.; Weber, L.I.; Fischer, L.G. Record of *Caromiobenella* (Copepoda, Monstrilloidea) in Brazil and discovery of the male of *C. brasiliensis*, morphological and molecular evidence. *Diversity* **2021**, *13*, 241. <https://doi.org/10.3390/d13060241>

| Genus                 | Species                      | GenBank Accession                                                                                              | Locality / Country                                         | Authority                   |
|-----------------------|------------------------------|----------------------------------------------------------------------------------------------------------------|------------------------------------------------------------|-----------------------------|
| <i>Maemonstrilla</i>  | <i>Maemonstrilla</i> sp.     | KY553231                                                                                                       | South Korea                                                | [3]                         |
|                       | <i>Maemonstrilla</i> sp.     | KY553232                                                                                                       | South Korea                                                | [3]                         |
|                       | <i>M. simplex</i>            | KR049003                                                                                                       | South Korea                                                | Baek& Hwang,( 2015) unpubl. |
| <i>Caromiobenella</i> | <i>C. polluxea</i>           | KY553211                                                                                                       | South Korea                                                | [3]                         |
|                       | <i>C. castorea</i>           | KY553209                                                                                                       | South Korea                                                | [3]                         |
|                       | <i>C. hamatapex</i> *        | KR048992                                                                                                       | Korea                                                      | Baek & Hwang(2015) unpubl.  |
|                       | <i>C. helgolandica</i> *     | KT209379                                                                                                       | North Sea: Skagerrak, Gullmarsfjord                        | [21]                        |
|                       | <i>C. helgolandica</i> *     | KT209330                                                                                                       | North Sea: Skagerrak, Gullmarsfjord                        | [21]                        |
|                       | <b><i>C.brasiliensis</i></b> | <b>MZ223432</b><br><b>MZ223430</b><br><b>MZ223431</b><br><b>MZ223433</b><br><b>MZ223434</b><br><b>MZ223435</b> | <b>Southwestern Atlantic, Rio de Janeiro Coast, Brazil</b> | <b>Present Study</b>        |
| <i>Monstrilla</i>     | <i>M. ilhoii</i>             | KY553214                                                                                                       | South Korea                                                | [3]                         |
| <i>Cymbasoma</i>      | <i>Cymbasoma</i> sp.         | KR048989                                                                                                       | Korea                                                      | Baek & Hwang(2015) unpubl.  |
|                       | <i>C. reticulatum</i>        | KR048990                                                                                                       | Korea                                                      | Baek & Hwang(2015) unpubl.  |
| <i>Monstrillopsis</i> | <i>M. longilobata</i>        | KY553229                                                                                                       | South Korea                                                | [3]                         |
|                       | <i>M. longilobata</i>        | KR049000                                                                                                       | Korea                                                      | Baek & Hwang (2015) unpubl. |
| <i>Lepeophtheirus</i> | <i>L. salmonis</i>           | KR049053                                                                                                       | Korea                                                      | Baek & Hwang (2015) unpubl  |
| <i>Tigriopus</i>      | <i>T. japonicus</i>          | KR049009                                                                                                       | Korea                                                      | Baek & Hwang (2015) unpubl  |
| <i>Calanus</i>        | <i>C. helgolandicus</i>      | AY604521                                                                                                       | Adriatic Sea, Mediterranean Sea                            | [22]                        |

\* *Monstrilla hamatapex* and *M. helgolandica* are currently recognized as members of *Caromiobenella* but named as *Monstrilla* in GenBank.

[3] Jeon, D.; Lee, W.: Soh, H.Y. New genus and two new species of monstrilloid copepods (Copepoda: Monstrillidae): integrating morphological, molecular phylogenetic, and ecological evidence. *J. Crust. Biol.* 2018a, 38, 45–65.

[21] Raupach, M.J.; Barco, A.; Steinke, D.; Beermann, J.; Laakmann, S.; Mohrbeck, I.; Neumann, H.; Kihara, T.C.; Pointner, K.; Radulovici, A.; Segelken-Voigt, A.; Wesse, C.; Knebelsberger, T. The Application of DNA Barcodes for the Identification of Marine Crustaceans from the North Sea and Adjacent Regions. *PLoS ONE* 2015, 10, e0139421.

- [22] Unal, E.; Frost, B.W.; Armbrust, V.; Kideys, A.E. Phylogeography of *Calanus helgolandicus* and the Black Sea copepod *Calanus euxinus*, with notes on *Pseudocalanus elongatus* (Copepoda, Calanoida). *Deep Sea Res. Part II Top. Stud. Oceanogr.* 2006, 53, 1961–1975.
